# Supplementary material
Source: PubMed Central journal article supplement (PMC2393767)

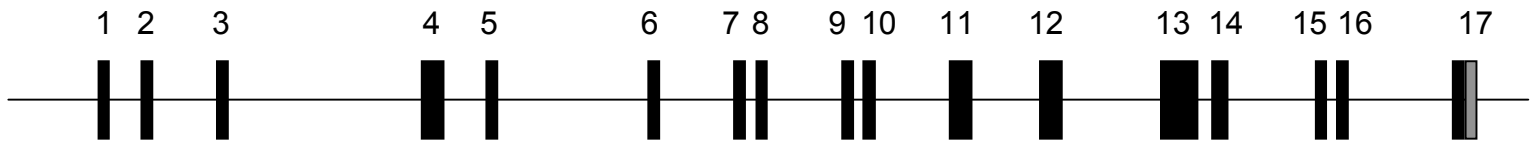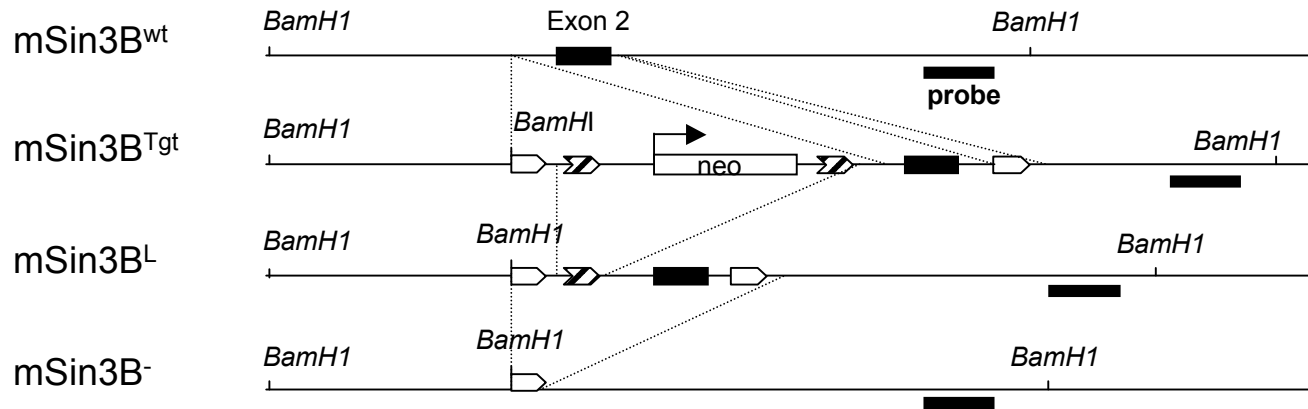

Supplement: pnas_0710285105_1.pdf [file pnas_0710285105_1.pdf]

mSin3B<sup>+/+</sup>mSin3B<sup>-/-</sup>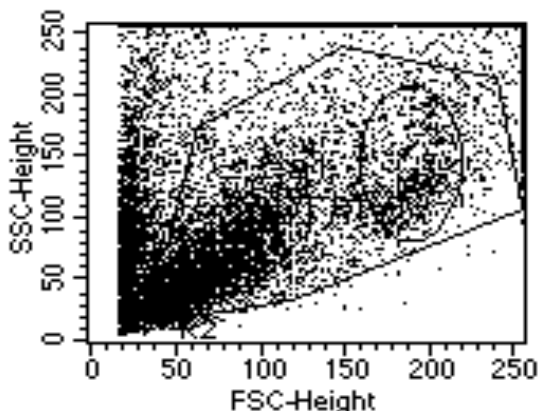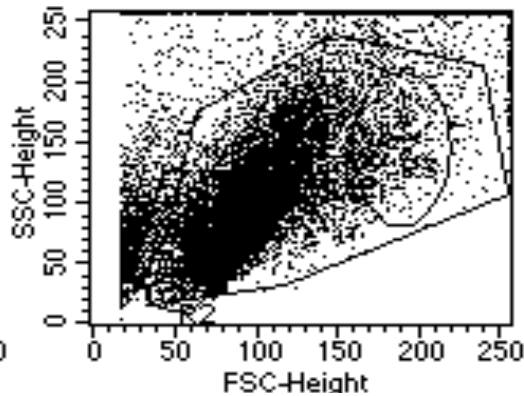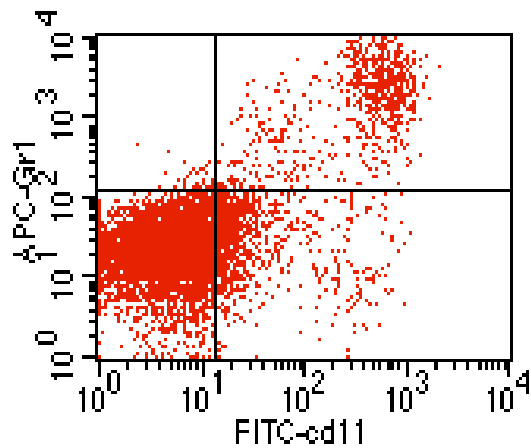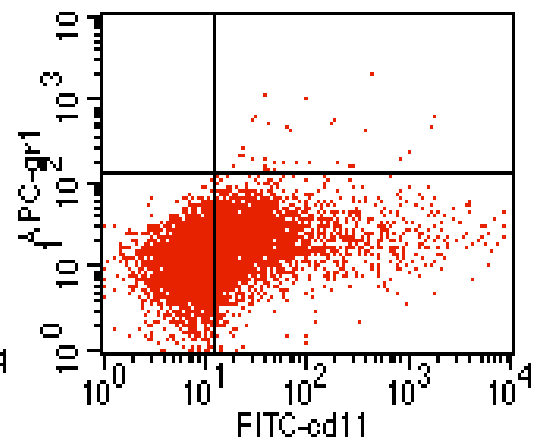

Supplement: pnas_0710285105_2.pdf [file pnas_0710285105_2.pdf]

**a.**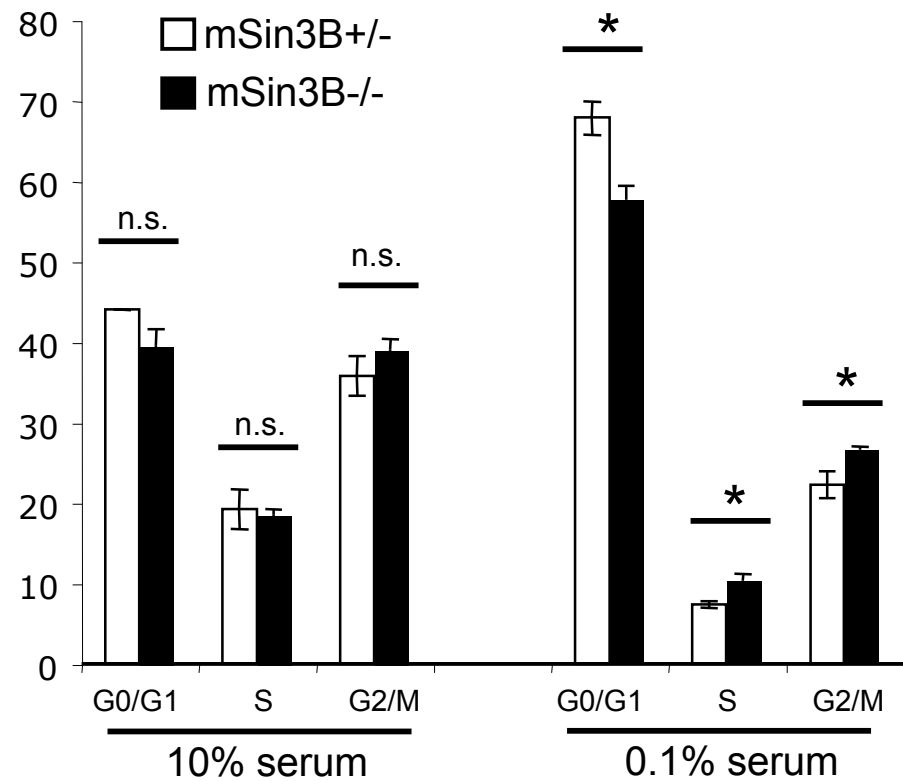**b.**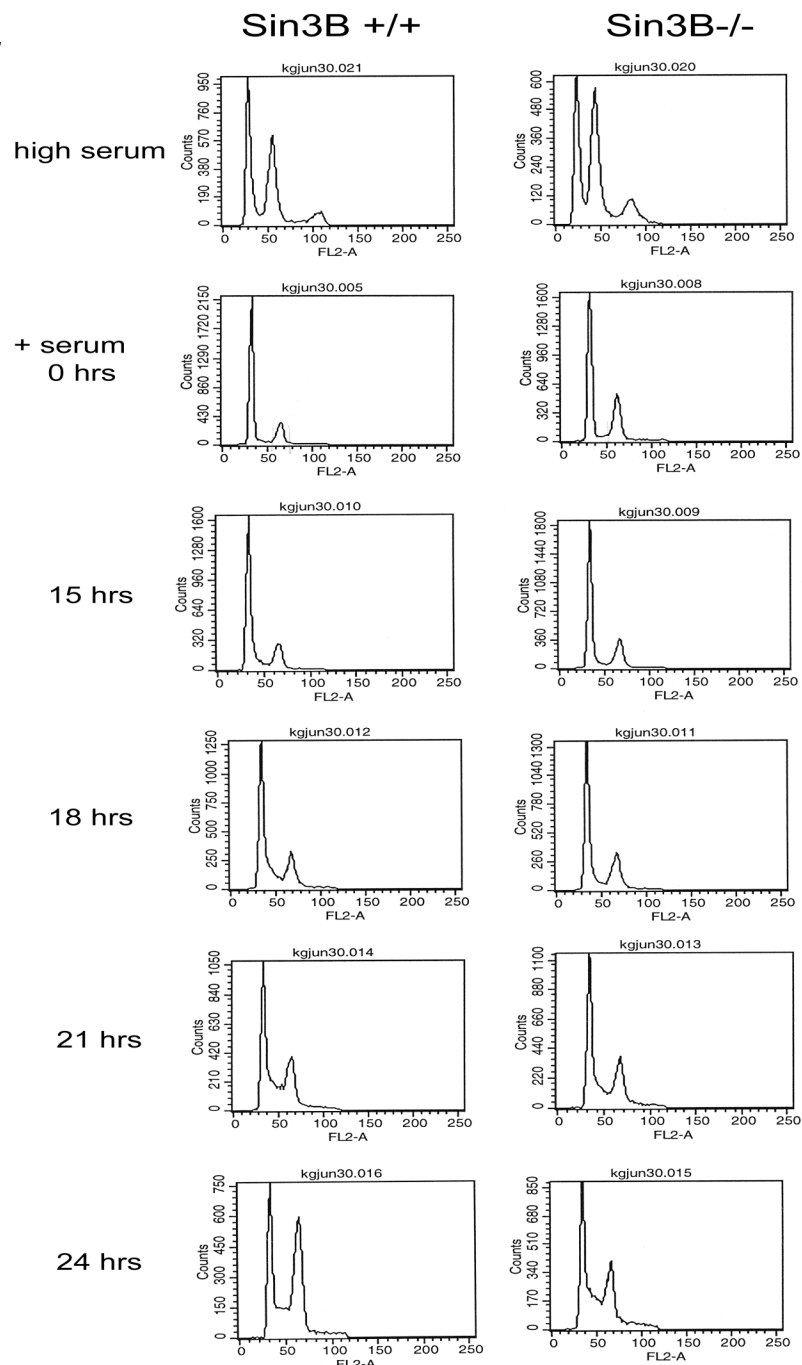**c.**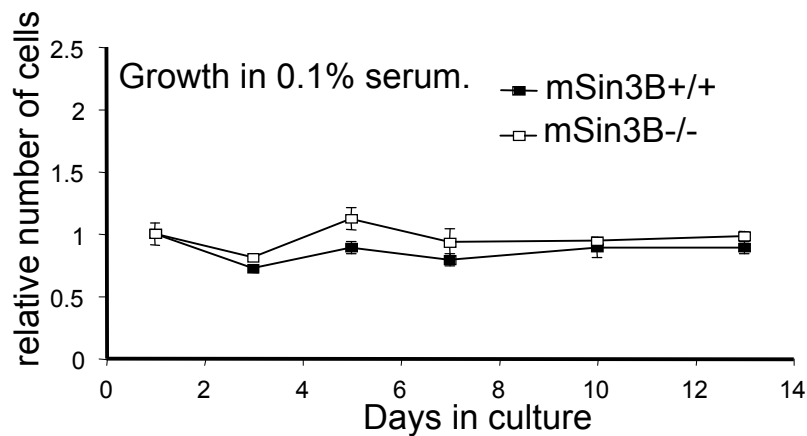**D**

Supplement: pnas_0710285105_3.pdf [file pnas_0710285105_3.pdf]
